# Supplementary material for: Artificial intelligence for automatic and objective assessment of competencies in flexible bronchoscopy
Source: PubMed Central journal article supplement — J Thorac Dis. 2024 Sep 6;16(9):5718–26. doi: 10.21037/jtd-24-841 (PMC11494585; doi:10.21037/jtd-24-841), 2024-09-06
Supplement: jtd-16-09-5718-dss.pdf [file jtd-16-09-5718-dss.pdf]

## Data Sharing Statement

|                     |                                                                                                                                                     |                                                             |
|---------------------|-----------------------------------------------------------------------------------------------------------------------------------------------------|-------------------------------------------------------------|
| <b>Article Info</b> | <a href="https://dx.doi.org/10.21037/jtd-24-841">https://dx.doi.org/10.21037/jtd-24-841</a>                                                         |                                                             |
| <b>Item</b>         | <b>Question</b>                                                                                                                                     | <b>Authors' Response<br/>(place "-" if not applicable)</b>  |
| 1                   | Would you like to share data collected for your study to others?                                                                                    | Yes                                                         |
| 2                   | If not, would you like to share the reason for your decision?                                                                                       | -                                                           |
| 3                   | What data in particular will be shared?                                                                                                             | The expert's ratings and the four outcome measures of AIBA. |
| 4                   | Any other documents will be shared? Such as study protocol, statistical analysis plan, informed consent form, clinical study report, analytic code. | Informed consent form can be shared upon request.           |
| 5                   | When will data availability begin?                                                                                                                  | From publication date                                       |
| 6                   | When will data availability end?                                                                                                                    | 2 years from publication date                               |
| 7                   | To whom will you share the data?                                                                                                                    | Researchers applying for the data sharing.                  |
| 8                   | For what type of analysis or purpose?                                                                                                               | Any type                                                    |
| 9                   | How or where can the data/documents be obtained?                                                                                                    | Upon request to the corresponding author                    |
| 10                  | Any other restrictions?                                                                                                                             | None                                                        |
